# Supplementary material
Source: HighWire-hosted journal article supplement (https://www.cmajopen.ca/highwire/filestream/80930/field_highwire_adjunct_files/0/open-2014-0094-1-at.pdf)
Supplement: open-2014-0094-1-at.pdf [file open-2014-0094-1-at.pdf]

# About You

## 1. What grade are you in?

- |                                |                                     |
|--------------------------------|-------------------------------------|
| <input type="radio"/> Grade 6  | <b>Quebec students only</b>         |
| <input type="radio"/> Grade 7  | <input type="radio"/> Grade 6       |
| <input type="radio"/> Grade 8  | <input type="radio"/> Secondary I   |
| <input type="radio"/> Grade 9  | <input type="radio"/> Secondary II  |
| <input type="radio"/> Grade 10 | <input type="radio"/> Secondary III |
| <input type="radio"/> Grade 11 | <input type="radio"/> Secondary IV  |
| <input type="radio"/> Grade 12 | <input type="radio"/> Secondary V   |

Please mark all your answers with full, dark marks like this:

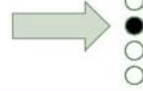

## 2. How old are you today?

- 11 years or younger
- 12 years
- 13 years
- 14 years
- 15 years
- 16 years
- 17 years
- 18 years
- 19 years or older

## 3. Are you...?

- Female
- Male

## 4. How would you describe yourself? (Mark all that apply)

- White
- Black
- Asian
- Aboriginal (First Nations, Métis, Inuit)
- Latin American/Hispanic
- Other \_\_\_\_\_

## 5. On average, about how many hours a day do you do the following?

|                                          | None                  | Less than 1 hour a day | 1 to 2 hours a day    | More than 2 but less than 5 hours a day | 5 or more hours a day |
|------------------------------------------|-----------------------|------------------------|-----------------------|-----------------------------------------|-----------------------|
| a) Watching/streaming TV shows or movies | <input type="radio"/> | <input type="radio"/>  | <input type="radio"/> | <input type="radio"/>                   | <input type="radio"/> |
| b) Playing video/computer games          | <input type="radio"/> | <input type="radio"/>  | <input type="radio"/> | <input type="radio"/>                   | <input type="radio"/> |
| c) Talking on the phone                  | <input type="radio"/> | <input type="radio"/>  | <input type="radio"/> | <input type="radio"/>                   | <input type="radio"/> |
| d) Surfing the internet                  | <input type="radio"/> | <input type="radio"/>  | <input type="radio"/> | <input type="radio"/>                   | <input type="radio"/> |
| e) Doing homework                        | <input type="radio"/> | <input type="radio"/>  | <input type="radio"/> | <input type="radio"/>                   | <input type="radio"/> |
| f) Reading for fun                       | <input type="radio"/> | <input type="radio"/>  | <input type="radio"/> | <input type="radio"/>                   | <input type="radio"/> |

## 6. For the next 3 statements, choose the answer that best describes how you feel about each statement.

|                                       | True                  | Mostly True           | Neutral               | Mostly False          | False                 |
|---------------------------------------|-----------------------|-----------------------|-----------------------|-----------------------|-----------------------|
| a) In general, I like the way I am.   | <input type="radio"/> | <input type="radio"/> | <input type="radio"/> | <input type="radio"/> | <input type="radio"/> |
| b) When I do something, I do it well. | <input type="radio"/> | <input type="radio"/> | <input type="radio"/> | <input type="radio"/> | <input type="radio"/> |
| c) I like the way I look.             | <input type="radio"/> | <input type="radio"/> | <input type="radio"/> | <input type="radio"/> | <input type="radio"/> |



15. How old were you when you smoked your first whole cigarette?

- I have never smoked a whole cigarette
- I do not know
  
- 8 years or younger
- 9 years
- 10 years
- 11 years
- 12 years
- 13 years
- 14 years
- 15 years
- 16 years
- 17 years
- 18 years or older

16. Have you ever smoked 100 or more whole cigarettes in your life?

- Yes
- No

17. Have you ever smoked every day for at least 7 days in a row?

- Yes
- No

18. On how many of the last 30 days did you smoke one or more cigarettes?

- None
- 1 day
- 2 to 3 days
- 4 to 5 days
- 6 to 10 days
- 11 to 20 days
- 21 to 29 days
- 30 days (*every day*)

19. Thinking back over the last 30 days, on the days that you smoked, how many cigarettes did you usually smoke each day?

- None
- A few puffs to one whole cigarette
- 2 to 3 cigarettes
- 4 to 5 cigarettes
- 6 to 10 cigarettes
- 11 to 20 cigarettes
- 21 to 29 cigarettes
- 30 or more cigarettes

For Office Use Only

|   | Sun | Mon | Tue | Wed | Thur | Fri | Sat |
|---|-----|-----|-----|-----|------|-----|-----|
| 0 | 0   | 0   | 0   | 0   | 0    | 0   | 0   |
| 1 | 1   | 1   | 1   | 1   | 1    | 1   | 1   |
| 2 | 2   | 2   | 2   | 2   | 2    | 2   | 2   |
| 3 | 3   | 3   | 3   | 3   | 3    | 3   | 3   |
| 4 | 4   | 4   | 4   | 4   | 4    | 4   | 4   |
| 5 | 5   | 5   | 5   | 5   | 5    | 5   | 5   |
| 6 | 6   | 6   | 6   | 6   | 6    | 6   | 6   |
| 7 | 7   | 7   | 7   | 7   | 7    | 7   | 7   |
| 8 | 8   | 8   | 8   | 8   | 8    | 8   | 8   |
| 9 | 9   | 9   | 9   | 9   | 9    | 9   | 9   |

20. Think back over the last 7 days.

Find yesterday on the wheel and fill in the number of whole cigarettes you smoked. Then, follow the wheel backwards and fill in the number of whole cigarettes you smoked on each of the last 7 days. If you have not smoked, mark one of the circles below.

- I have never smoked
- I did not smoke over the last 7 days

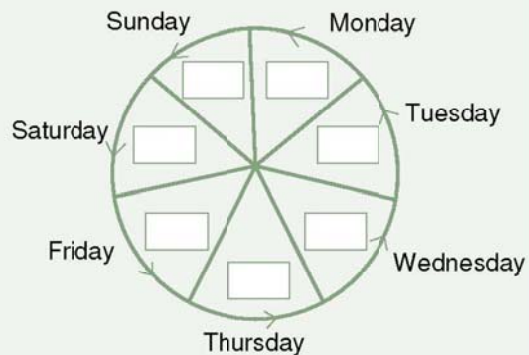





**26. Thinking about the last time you bought cigarettes in the last 12 months, what did you buy and how much did you pay?**

For example: If you bought a pack of 20 cigarettes for \$6.50, you would fill in the "A pack of 20 cigarettes" bubble and then fill in the "\$6.01 to \$8.00" bubble, as shown below.

A pack of 20 cigarettes   \$6.01 to \$8.00

**a) What did you buy?**

- I did not buy cigarettes in the last 12 months
- A single cigarette
- A pack of 20 cigarettes
- A pack of 25 cigarettes
- A bag of 200 cigarettes
- A carton (200 cigarettes)
- A can or pouch of tobacco (loose tobacco)
- Another amount

**b) How much did you pay?**

- I did not buy cigarettes in the last 12 months
- I do not remember the price
- Less than 10 cents
- 10 cents to 50 cents
- 51 cents to \$1.00
- \$1.01 to \$6.00
- \$6.01 to \$8.00
- \$8.01 to \$10.00
- \$10.01 to \$15.00
- \$15.01 to \$20.00
- \$20.01 to \$40.00
- \$40.01 to \$60.00
- \$60.01 to \$80.00
- \$80.01 or more

**27. Have you ever tried to quit smoking cigarettes?**

- I have never smoked
- I have only smoked a few times
- I have never tried to quit
- I have tried to quit once
- I have tried to quit 2 or 3 times
- I have tried to quit 4 or 5 times
- I have tried to quit 6 or more times

**28. Have you ever read, seen, or heard about the 1-866-366-3667 quit line or the [gosmokefree.gc.ca/quit](http://gosmokefree.gc.ca/quit) website on a cigarette package?**

- Yes
- No

**29. Have you ever used/contacted the 1-866-366-3667 quit line or the [gosmokefree.gc.ca/quit](http://gosmokefree.gc.ca/quit) website?**

- Yes
- No

**30. Have you ever tried any of the following? (Mark all that apply)**

- Smoking pipe tobacco
- Smoking little cigars or cigarillos (plain or flavoured)
- Smoking cigars (not including little cigars or cigarillos, plain or flavoured)
- Smoking roll-your-own cigarettes (tobacco only)
- Smoking bidis (little cigarettes that are hand-rolled in leaves, tied with a string at the ends, and may come in different flavours)
- Using smokeless tobacco (chewing tobacco, pinch, snuff, or snus)
- Using nicotine patches, nicotine gum, nicotine lozenges, or nicotine inhalers
- Using a water-pipe (hookah) to smoke sheesha (herbal or tobacco)
- Using blunt wraps (a sheet or tube made of tobacco used to roll cigarette tobacco)
- I have not tried any of these things









**43. On a usual day, how many servings of fruits and/or vegetables do you eat?**

(*Include* fresh, frozen, canned, and cooked items like apple, banana, carrot, salads, and 100% juice. *Do not include* chips, french fries, or other fried potatoes)

- 0 servings
- 1-2 servings
- 3-4 servings
- 5 servings
- 6 servings
- 7 servings
- 8 or more servings

**Some examples of single servings:**

**1 Serving =**

- ½ cup of fresh, frozen, or cooked vegetables
- 1 cup of raw leafy vegetables; like a small salad
- 1 medium fruit; like an apple, pear, or banana
- ½ cup of 100% fruit or vegetable juice

**44. How strongly do you agree or disagree with each of the following?**

|                                                      | Strongly Agree        | Agree                 | Disagree              | Strongly Disagree     |
|------------------------------------------------------|-----------------------|-----------------------|-----------------------|-----------------------|
| a) I feel close to people at my school.              | <input type="radio"/> | <input type="radio"/> | <input type="radio"/> | <input type="radio"/> |
| b) I feel I am part of my school.                    | <input type="radio"/> | <input type="radio"/> | <input type="radio"/> | <input type="radio"/> |
| c) I am happy to be at my school.                    | <input type="radio"/> | <input type="radio"/> | <input type="radio"/> | <input type="radio"/> |
| d) I feel the teachers at my school treat me fairly. | <input type="radio"/> | <input type="radio"/> | <input type="radio"/> | <input type="radio"/> |
| e) I feel safe in my school.                         | <input type="radio"/> | <input type="radio"/> | <input type="radio"/> | <input type="radio"/> |
| f) Getting good grades is important to me.           | <input type="radio"/> | <input type="radio"/> | <input type="radio"/> | <input type="radio"/> |

**45. Which of the following best describes your marks during the past year?**

- Mostly A's / above 85% / level 4
- Mostly A's and B's / 70 - 84% / level 3 - 4
- Mostly B's and C's / 60 - 69% / level 3
- Mostly C's / 50 - 59% / level 2
- Mostly letter grades below C's / below 50% / level 1

**46. In the last 30 days, in what ways were you bullied by other students? (Mark all that apply)**

- I have not been bullied in the last 30 days
- Physical attacks (e.g., getting beaten up, pushed, or kicked)
- Verbal attacks (e.g., getting teased, threatened, or having rumours spread about you)
- Cyber-attacks (e.g., being sent mean text messages or having rumours spread about you on the internet)
- Had someone steal from you or damage your things

**47. In the last 30 days, in what ways did you bully other students? (Mark all that apply)**

- I did not bully other students in the last 30 days
- Physical attacks (e.g., beat up, pushed, or kicked them)
- Verbal attacks (e.g., teased, threatened, or spread rumours about them)
- Cyber-attacks (e.g., sent mean text messages or spread rumours about them on the internet)
- Stole from them or damaged their things

**48. About how much money do you usually get each week to spend on yourself or to save?**

(Remember to include all money from allowances and jobs like babysitting, delivering papers...)

- I do not know how much money I get each week
- Zero
- \$1 to \$5
- \$6 to \$10
- \$11 to \$20
- \$21 to \$40
- \$41 to \$100
- More than \$100
